# Supplementary material for: High-Quality Genome Assembly of Chrysaora quinquecirrha Provides Insights Into the Adaptive Evolution of Jellyfish
Source: PubMed Central journal article supplement (PMC7287180; doi:10.3389/fgene.2020.00535), 2020-06-04
Supplement: Data_Sheet_1.pdf [file Data_Sheet_1.pdf]

## Supplementary Material

### Supplementary Tables

**Table S1. The statistics of sequencing reads on Illumina platform.** These data were produced by short insert library. Results are shown for filtered reads. Sequencing depth was calculated by assembled genome size.

| Library ID | Read Pairs  | Total bases    | Sequencing strategy | Sequencing depth (X) |
|------------|-------------|----------------|---------------------|----------------------|
| NGS-L1     | 171,522,496 | 51,456,748,800 | PE150               | 156.25               |

**Table S2. The statistics of sequencing reads on Nanopore platform.** Only reads with quality value  $Q > 7$  were used.

| Library ID    | Average length | N50 length | Read number | Total bases    |
|---------------|----------------|------------|-------------|----------------|
| TGS-L1        | 23,259         | 29,300     | 1,305,874   | 30,373,512,861 |
| TGS-L2        | 22,923         | 27,729     | 2,213,623   | 50,744,961,441 |
| Total/Average | 23,091         | 28,515     | 3,519,497   | 81,118,474,302 |

**Table S3. Comparison of genome assembly quality.**

| Species                       | Genome source | Genome size | Scaffold N50 | Contig N50 | Total scaffold number | Total contig number | Gene number | BUSCO  |
|-------------------------------|---------------|-------------|--------------|------------|-----------------------|---------------------|-------------|--------|
| <i>Hydra vulgaris</i>         | NCBI          | 852,170,992 | 96,317       | 10,112     | 20,916                | 126,669             | 20,055      | 83.70% |
| <i>Stylophora pistillata</i>  | NCBI          | 400,120,318 | 457,453      | 20,604     | 5,688                 | 37,615              | 24,833      | 88.00% |
| <i>Acropora digitifera</i>    | NCBI          | 447,497,157 | 483,559      | 10,915     | 2,421                 | 54,401              | 26,073      | 74.40% |
| <i>Nematostella vectensis</i> | NCBI          | 356,613,585 | 472,588      | 19,835     | 19,835                | 59,149              | 24,780      | 91.40% |
| <i>Exaiptasia pallida</i>     | NCBI          | 256,132,296 | 442,145      | 14,401     | 4,312                 | 29,750              | 22,509      | 87.10% |
| <i>Aurelia aurita</i>         | NCBI          | 757,170,055 | 1,042,981    | 33,962     | 2709                  | 19,288              | 27,044      | 84.10% |
| <i>Renilla muelleri</i>       | GigaDB        | 172,160,214 | 70,522       | 64,781     | 4925                  | 5,196               | 23,671      | 87.70% |
| <i>Nemopilema nomurai</i>     | NCBI          | 213,621,014 | 2,711,397    | 849,297    | 251                   | 1,463               | 19,525      | 86.90% |
| <i>Clytia hemisphaerica</i>   | marimba       | 445,210,140 | 366,311      | 3,861      | 7,644                 | 187,243             | 25,087      | 86.40% |
| <i>Mnemiopsis leidyi</i>      | nhgri         | 155,865,547 | 187,314      | 11,936     | 5,100                 | 24,884              | 16,548      | 77.30% |

*H. vulgaris*: [https://www.ncbi.nlm.nih.gov/assembly/GCF\\_000004095.1](https://www.ncbi.nlm.nih.gov/assembly/GCF_000004095.1); *S. pistillata*:

[https://www.ncbi.nlm.nih.gov/assembly/GCF\\_002571385.1](https://www.ncbi.nlm.nih.gov/assembly/GCF_002571385.1); *A. digitifera*:

[https://www.ncbi.nlm.nih.gov/assembly/GCF\\_000222465.1](https://www.ncbi.nlm.nih.gov/assembly/GCF_000222465.1); *N. vectensis*:

[https://www.ncbi.nlm.nih.gov/assembly/GCF\\_000209225.1](https://www.ncbi.nlm.nih.gov/assembly/GCF_000209225.1); *E. pallida*:

[https://www.ncbi.nlm.nih.gov/assembly/GCF\\_001417965.1](https://www.ncbi.nlm.nih.gov/assembly/GCF_001417965.1); *A. aurita*:

[https://www.ncbi.nlm.nih.gov/assembly/GCA\\_004194415.1](https://www.ncbi.nlm.nih.gov/assembly/GCA_004194415.1); *R. muelleri*: <http://gigadb.org/dataset/100565>; *N.*

*nomurai*: [https://www.ncbi.nlm.nih.gov/assembly/GCA\\_003864495.1](https://www.ncbi.nlm.nih.gov/assembly/GCA_003864495.1); *C. hemisphaerica*: [http://marimba.obs-](http://marimba.obs-vlfr.fr/organism/Clytia/hemisphaerica)

[vlfr.fr/organism/Clytia/hemisphaerica](http://marimba.obs-vlfr.fr/organism/Clytia/hemisphaerica); *M. leidyi*: <https://research.nhgri.nih.gov/mnemiopsis>.

**Table S4. Assembly quality evaluation using BUSCO.**

| Dataset | Library   | Percentage (%)                                 |
|---------|-----------|------------------------------------------------|
| Genome  | Eukaryota | C:79.6%[S:66.7%,D:12.9%],F:8.3%,M:12.1%,n:303  |
|         | Metazoa   | C:78.8%[S:63.9%,D:14.9%],F:5.0%,M:16.2%,n:978  |
| CDS     | Eukaryota | C:77.2%[S:66.3%,D:10.9%],F:10.2%,M:12.6%,n:303 |

|         |           |                                               |
|---------|-----------|-----------------------------------------------|
| Protein | Metazoa   | C:73.3%[S:61.2%,D:12.1%],F:7.8%,M:18.9%,n:978 |
|         | Eukaryota | C:77.9%[S:66.3%,D:11.6%],F:8.3%,M:13.8%,n:303 |
|         | Metazoa   | C:72.9%[S:61.0%,D:11.9%],F:7.7%,M:19.4%,n:978 |

Note: Complete BUSCOs (C); Complete and single-copy BUSCOs (S); Complete and duplicated BUSCOs (D); Fragmented BUSCOs (F); Missing BUSCOs (M); Total BUSCO groups searched (n).

**Table S5. The statistics of RNA sequencing reads on Illumina platform.** These data were produced by short insert library. Results are shown for filtered reads.

| Library ID | Read pairs | Tissue | Sequencing strategy | Total bases    |
|------------|------------|--------|---------------------|----------------|
| T1         | 28,556,004 | muscle | PE150               | 7,995,681,120  |
| T2         | 18,864,370 | muscle | PE150               | 5,282,023,600  |
| Total      | 47,420,374 | -      | -                   | 13,277,704,720 |

**Table S6. The statistics of *de novo* transcript assembly by Bridger software.**

| Term                   | Length (bp) | Number  |
|------------------------|-------------|---------|
| N90                    | 336         | 71,913  |
| N80                    | 634         | 44,269  |
| N70                    | 1,207       | 30,129  |
| N60                    | 1,775       | 21,748  |
| N50                    | 2,305       | 15,661  |
| Max length (bp)        | 31,711      | -       |
| Total size (bp)        | 123,770,934 | -       |
| Total number (>100 bp) | -           | 120,198 |
| Total number (>10 kb)  | -           | 220     |

**Table S7. Transcript assembly evaluation using BUSCO software.**

| Library   | Percentage (%)                               |
|-----------|----------------------------------------------|
| Eukaryota | C:99.6%[S:34.3%,D:65.3%],F:0.3%,M:0.1%,n:303 |
| Metazoa   | C:96.0%[S:32.2%,D:63.8%],F:1.0%,M:3.0%,n:978 |

Note: Complete BUSCOs (C); Complete and single-copy BUSCOs (S); Complete and duplicated BUSCOs (D); Fragmented BUSCOs (F); Missing BUSCOs (M); Total BUSCO groups searched (n).

**Table S8. Mapping ratio of Illumina short reads on the assembled genome.** PE mapped represents reads mapped to genome as read pairs, SE mapped represents reads mapped to genome as single reads.

| Term         | # Mapped reads | Mapped ratio (%) |
|--------------|----------------|------------------|
| PE mapped    | 248,672,844    | 73.52%           |
| SE mapped    | 4,727,992      | 1.40%            |
| Total mapped | 273,209,877    | 79.76%           |

**Table S9. Mapping ratio of transcripts in genome assembly.**

| Total transcripts | Mapped number | Mapping ratio (%) |
|-------------------|---------------|-------------------|
| 120,198           | 85,556        | 71.18             |

**Table S10. The statistics of annotated repetitive sequences in *C. quinquecirrha* genome.**

| Software | Repeat Size (bp) | % of genome |
|----------|------------------|-------------|
| TRF      | 34,152,943       | 10.139838   |

|               |             |           |
|---------------|-------------|-----------|
| Repeatmasker  | 11,940,847  | 3.545178  |
| Proteinmasker | 13,648,690  | 4.052228  |
| RepeatModeler | 121,407,295 | 36.045219 |
| Total         | 149,862,365 | 44.493388 |

**Table S11. The statistics of annotated protein-coding genes in *C. quinquecirrha* genome.** GN, gene number; AML, average mRNA length; TEN, total exon number; AEL, average exon length; AEN, average exon number; TIL, total intron length.

|        |          |         |        |      |            |
|--------|----------|---------|--------|------|------------|
| GN     | AML      | TEN     | AEL    | AEN  | TIL        |
| 21,606 | 6,014.50 | 131,349 | 248.55 | 6.08 | 97,302,196 |

**Table S12. The statistics of gene families among species.**

| Species                 | Gene number | Gene in family | Unclustered genes | Family number | Unique families |
|-------------------------|-------------|----------------|-------------------|---------------|-----------------|
| <i>S. pistillata</i>    | 24,846      | 21,052         | 3,794             | 13,948        | 655             |
| <i>E. pallida</i>       | 22,509      | 19,057         | 3,452             | 12,878        | 534             |
| <i>R. muelleri</i>      | 23,671      | 19,951         | 3,720             | 8,828         | 816             |
| <i>A. aurita</i>        | 27,044      | 19,340         | 7,704             | 11,773        | 1,366           |
| <i>A. digitifera</i>    | 26,073      | 21,559         | 4,514             | 13,366        | 631             |
| <i>C. quinquecirrha</i> | 21,606      | 17,370         | 4,236             | 9,631         | 728             |
| <i>H. vulgaris</i>      | 20,055      | 16,673         | 3,382             | 8,595         | 653             |
| <i>E. granulosus</i>    | 11,319      | 5,676          | 5,643             | 4,366         | 339             |
| <i>N. vectensis</i>     | 24,780      | 19,184         | 5,596             | 12,794        | 887             |
| <i>N. nomurai</i>       | 19,525      | 16,364         | 3,161             | 11,217        | 477             |

**Table S13. The KEGG enrichment analysis of specific gene family in all jellyfish species.**

| Map Number | Pathway                    | Count | P-value  |
|------------|----------------------------|-------|----------|
| map04340   | Hedgehog signaling pathway | 3     | 0.001342 |
| map05217   | Basal cell carcinoma       | 3     | 0.001521 |
| map04350   | TGF-beta signaling pathway | 2     | 0.012341 |
| map05200   | Pathways in cancer         | 4     | 0.035948 |
| map04360   | Axon guidance              | 2     | 0.036715 |
| map04390   | Hippo signaling pathway    | 2     | 0.036715 |

**Table S14. The calibration data used in divergence time analysis.**

| Node                                                                                                         | Estimated Time | Range             | Reference (DOI)                                                                   |
|--------------------------------------------------------------------------------------------------------------|----------------|-------------------|-----------------------------------------------------------------------------------|
| <i>S. pistillata</i> and <i>A. digitifera</i>                                                                | 250 MYA        | 248 - 253 MYA     | 10.1016/j.ympcv.2011.10.008;<br>10.2307/41317044;<br>10.1002/ece3.527             |
| <i>A. aurita</i> and <i>C. quinquecirrha</i>                                                                 | 451 MYA        | CI: n/a           | 10.1016/j.ympcv.2011.10.008<br>10.1016/j.cub.2015.09.066;                         |
| <i>N. vectensis</i> and ( <i>S. pistillata</i> and <i>A. digitifera</i> )                                    | 569 MYA        | 539 - 600 MYA     | 10.1111/ede.12168;<br>10.1016/j.ympcv.2015.05.013;<br>10.1016/j.ympcv.2011.10.008 |
| <i>H. vulgaris</i> and ( <i>A. aurita</i> and <i>C. quinquecirrha</i> )                                      | 581 MYA        | 556 - 607 MYA     | 10.1016/j.ympcv.2015.05.013;<br>10.1016/j.ympcv.2011.10.008;                      |
| ( <i>N. vectensis</i> , <i>S. pistillata</i> and <i>A. digitifera</i> ) and ( <i>H. vulgaris</i> , <i>A.</i> | 617 MYA        | CI: 540 - 667 MYA | 10.1073/pnas.0503660102;<br>10.1073/pnas.0401670101;                              |

|                                                                                                                                                                                           |         |                       |                                                                                                                                                                                                                                                                     |
|-------------------------------------------------------------------------------------------------------------------------------------------------------------------------------------------|---------|-----------------------|---------------------------------------------------------------------------------------------------------------------------------------------------------------------------------------------------------------------------------------------------------------------|
| <i>aurita</i> and <i>C. quinquecirrha</i> )                                                                                                                                               |         |                       | 10.1111/ede.12168;<br>10.1093/icb/icm071;<br>10.1016/j.cub.2015.09.066;<br>10.1016/j.ympcv.2015.05.013;<br>10.1098/rstb.2007.2233;<br>10.1016/j.ympcv.2011.10.008<br>10.1073/pnas.0503660102;<br>10.1073/pnas.0401670101;<br>10.1038/srep04127;<br>10.2307/3070910; |
| <i>E. granulosus</i> and ( <i>N. vectensis</i> ,<br><i>S. pistillata</i> , <i>A. digitifera</i> , <i>H.</i><br><i>vulgaris</i> , <i>A. aurita</i> and <i>C.</i><br><i>quinquecirrha</i> ) | 824 MYA | CI: 611 - 1035<br>MYA | 10.1016/j.cub.2015.09.066;<br>10.1098/rstb.2007.2233;<br>10.1111/ede.12168;<br>10.1073/pnas.1110633108;<br>10.2307/2640769;<br>10.1016/S0022-5193(03)00057-2;<br>10.1186/1471-2148-4-2                                                                              |

**Table S15. The GO enrichment analysis of expanded gene families in all jellyfish species.**

| GO ID      | GO Term                   | GO Class | P-value  |
|------------|---------------------------|----------|----------|
| GO:0008146 | sulfotransferase activity | MF       | 1.49E-24 |
| GO:0003676 | nucleic acid binding      | MF       | 8.60E-21 |

**Table S16. The KEGG enrichment analysis of expanded gene families in all jellyfish species.**

| Map Number | Pathway                                    | Count | P-value     |
|------------|--------------------------------------------|-------|-------------|
| map00062   | Fatty acid elongation                      | 19    | 1.96E-05    |
| map05206   | MicroRNAs in cancer                        | 28    | 0.000138492 |
| map05222   | Small cell lung cancer                     | 22    | 0.000159139 |
| map00930   | Caprolactam degradation                    | 17    | 0.000257858 |
| map04320   | Dorso-ventral axis formation               | 12    | 0.000264635 |
| map00362   | Benzoate degradation                       | 17    | 0.000293621 |
| map04724   | Glutamatergic synapse                      | 17    | 0.000427916 |
| map00627   | Aminobenzoate degradation                  | 17    | 0.000612208 |
| map04142   | Lysosome                                   | 21    | 0.001330432 |
| map00410   | beta-Alanine metabolism                    | 17    | 0.00217962  |
| map00650   | Butanoate metabolism                       | 17    | 0.002633381 |
| map00071   | Fatty acid degradation                     | 18    | 0.002908315 |
| map00380   | Tryptophan metabolism                      | 17    | 0.003778665 |
| map04330   | Notch signaling pathway                    | 12    | 0.005299582 |
| map00640   | Propanoate metabolism                      | 17    | 0.005758856 |
| map05216   | Thyroid cancer                             | 11    | 0.006118495 |
| map00984   | Steroid degradation                        | 3     | 0.009528671 |
| map00280   | Valine, leucine and isoleucine degradation | 17    | 0.009872379 |
| map01212   | Fatty acid metabolism                      | 17    | 0.013110729 |
| map05030   | Cocaine addiction                          | 10    | 0.016803431 |
| map03018   | RNA degradation                            | 21    | 0.017749821 |
| map04512   | ECM-receptor interaction                   | 20    | 0.018005727 |

|          |                                         |    |             |
|----------|-----------------------------------------|----|-------------|
| map05219 | Bladder cancer                          | 10 | 0.020359278 |
| map05200 | Pathways in cancer                      | 38 | 0.020915917 |
| map01040 | Biosynthesis of unsaturated fatty acids | 5  | 0.022660713 |
| map05223 | Non-small cell lung cancer              | 10 | 0.031605665 |
| map00310 | Lysine degradation                      | 17 | 0.033132069 |
| map05132 | Salmonella infection                    | 13 | 0.036615923 |
| map05218 | Melanoma                                | 10 | 0.03713848  |
| map03013 | RNA transport                           | 20 | 0.049512577 |

**Table S17. The codon usage analysis based on CondonW.**

| Species                 | T3s   | C3s    | A3s    | G3s        | CAI        | CBI      | Fop      |
|-------------------------|-------|--------|--------|------------|------------|----------|----------|
| <i>S. pistillata</i>    | 0.38  | 0.2605 | 0.3747 | 0.26       | 0.112      | 0.045    | 0.43     |
| <i>E. pallida</i>       | 0.399 | 0.247  | 0.4111 | 0.225      | 0.122      | 0.05     | 0.44     |
| <i>R. muelleri</i>      | 0.41  | 0.2182 | 0.4219 | 0.238      | 0.121      | 0.029    | 0.42     |
| <i>A. aurita</i>        | 0.376 | 0.2389 | 0.4216 | 0.255      | 0.115      | 0.029    | 0.42     |
| <i>A. digitifera</i>    | 0.38  | 0.2617 | 0.3698 | 0.263      | 0.113      | 0.049    | 0.43     |
| <i>C. quinquecirrha</i> | 0.410 | 0.2233 | 0.4317 | 0.231      | 0.123      | 0.03     | 0.43     |
| <i>H. vulgaris</i>      | 0.511 | 0.1463 | 0.4905 | 0.155      | 0.135      | -0.01    | 0.41     |
| <i>E. granulosus</i>    | 0.35  | 0.3251 | 0.276  | 0.287      | 0.096      | 0.042    | 0.42     |
| <i>A. queenslandica</i> | 0.364 | 0.2561 | 0.3819 | 0.257      | 0.107      | 0.044    | 0.424    |
| <i>M. leidy</i>         | 0.341 | 0.3161 | 0.3341 | 0.285      | 0.111      | 0.078    | 0.45     |
| <i>N. vectensis</i>     | 0.328 | 0.3202 | 0.3182 | 0.3        | 0.099      | 0.033    | 0.42     |
| <i>N. nomurai</i>       | 0.347 | 0.2849 | 0.3583 | 0.294      | 0.11       | 0.047    | 0.43     |
| Species                 | Nc    | GC3s   | GC     | L_sym      | L_aa       | Gravy    | Aromo    |
| <i>S. pistillata</i>    | 55.9  | 0.4    | 0.44   | 12,394,983 | 12,829,521 | -0.3895  | 0.084224 |
| <i>E. pallida</i>       | 54.1  | 0.36   | 0.419  | 10,970,204 | 11,368,571 | -0.41696 | 0.085453 |
| <i>R. muelleri</i>      | 53.8  | 0.35   | 0.413  | 11,233,151 | 11,632,190 | -0.49698 | 0.077992 |
| <i>A. aurita</i>        | 53.4  | 0.37   | 0.412  | 11,827,819 | 12,308,923 | -0.42237 | 0.089275 |
| <i>A. digitifera</i>    | 56    | 0.4    | 0.44   | 11,233,718 | 11,627,719 | -0.36714 | 0.084673 |
| <i>C. quinquecirrha</i> | 52    | 0.34   | 0.405  | 10,471,744 | 10,843,663 | -0.46888 | 0.082877 |
| <i>H. vulgaris</i>      | 44.9  | 0.22   | 0.339  | 8,181,216  | 8,454,384  | -0.32607 | 0.095167 |
| <i>E. granulosus</i>    | 58.7  | 0.49   | 0.494  | 5,106,193  | 5,277,910  | -0.28106 | 0.078778 |
| <i>A. queenslandica</i> | 54.6  | 0.40   | 0.423  | 8,797,823  | 9,215,299  | -0.21025 | 0.097323 |
| <i>M. leidy</i>         | 56.9  | 0.46   | 0.458  | 7,383,239  | 7,637,068  | -0.40296 | 0.081944 |
| <i>N. vectensis</i>     | 59.1  | 0.48   | 0.474  | 7,988,803  | 8,293,994  | -0.30605 | 0.087586 |
| <i>N. nomurai</i>       | 56.7  | 0.44   | 0.45   | 9,159,681  | 9,480,074  | -0.42319 | 0.081823 |

**Table S18. The codon usage of protein-coding genes in *C. quinquecirrha*.**

| Amino acid | Codon | Frequency | Number  |
|------------|-------|-----------|---------|
| Phe        | UUU   | 1.186     | 266,166 |
|            | UUC   | 0.814     | 182,706 |
|            | UUA   | 1.088     | 172,096 |
| Leu        | UUG   | 1.409     | 222,871 |
|            | CUU   | 1.336     | 211,197 |
|            | CUC   | 0.547     | 86,438  |

## Supplementary Material

|     |     |       |         |
|-----|-----|-------|---------|
|     | CUA | 0.688 | 108,716 |
|     | CUG | 0.932 | 147,412 |
|     | UCU | 1.320 | 289,077 |
| Ser | UCC | 0.820 | 179,708 |
|     | UCA | 0.860 | 188,365 |
|     | UCG | 1.000 | 250,361 |
|     | CCU | 1.602 | 257,413 |
| Pro | CCC | 0.778 | 124,936 |
|     | CCA | 0.833 | 133,822 |
|     | CCG | 0.787 | 126,405 |
| Tyr | UAU | 1.224 | 180,633 |
|     | UAC | 0.503 | 74,280  |
| Ter | UAA | 1.671 | 246,562 |
|     | UAG | 0.529 | 78,063  |
| Cys | UGU | 1.190 | 175,664 |
|     | UGC | 0.883 | 130,324 |
| Ter | UGA | 1.261 | 139,144 |
| Trp | UGG | 1.814 | 200,209 |
| His | CAU | 0.426 | 47,066  |
|     | CAC | 0.499 | 55,017  |
| Gln | CAA | 1.167 | 171,575 |
|     | CAG | 1.700 | 249,933 |
|     | CGU | 0.578 | 84,928  |
| Arg | CGC | 0.556 | 81,795  |
|     | CGA | 1.366 | 217,295 |
|     | CGG | 0.600 | 95,422  |
| Ile | AUU | 1.650 | 262,509 |
|     | AUC | 0.385 | 61,225  |
|     | AUA | 1.209 | 198,485 |
| Met | AUG | 0.791 | 129,771 |
|     | ACU | 1.110 | 14,116  |
| Thr | ACC | 0.611 | 7,766   |
|     | ACA | 1.280 | 16,278  |
|     | ACG | 1.350 | 171,441 |
| Asn | AAU | 0.650 | 82,452  |
|     | AAC | 1.220 | 273,187 |
| Lys | AAA | 0.780 | 174,754 |
|     | AAG | 1.267 | 361,858 |
| Ser | AGU | 0.733 | 209,570 |
|     | AGC | 1.258 | 532,808 |
| Arg | AGA | 0.742 | 314,239 |
|     | AGG | 1.377 | 441,374 |
| Val | GUU | 0.623 | 199,567 |
|     | GUC | 1.369 | 526,310 |
|     | GUA | 0.631 | 242,630 |
|     | GUC | 1.105 | 125,845 |

|     |     |       |         |
|-----|-----|-------|---------|
|     | GCU | 0.895 | 101,899 |
| Ala | GCC | 1.000 | 121,558 |
|     | GCA | 0.753 | 72,198  |
|     | GCG | 0.425 | 40,745  |
| Asp | GAU | 0.926 | 88,711  |
|     | GAC | 0.304 | 29,099  |
| Glu | GAA | 2.630 | 252,073 |
|     | GAG | 0.962 | 92,166  |
|     | GGU | 1.182 | 165,920 |
| Gly | GGC | 1.559 | 218,919 |
|     | GGA | 0.766 | 107,479 |
|     | GGG | 0.493 | 69,272  |

**Table S19. The relative evolution rate of species employed by LINTRE.**

| Outgroup             | Ingroup1                | Ingroup2             | bA       | bB       | delta    | Z score   | CP     |
|----------------------|-------------------------|----------------------|----------|----------|----------|-----------|--------|
| <i>E. granulosus</i> | <i>C. quinquecirrha</i> | <i>S. pistillata</i> | 0.375811 | 0.524235 | 0.148424 | 19.057774 | 99.96% |
| <i>E. granulosus</i> | <i>C. quinquecirrha</i> | <i>E. pallida</i>    | 0.387301 | 0.514623 | 0.127322 | 16.245096 | 99.96% |
| <i>E. granulosus</i> | <i>C. quinquecirrha</i> | <i>R. muelleri</i>   | 0.497607 | 0.508538 | 0.010931 | 1.295492  | 80.30% |
| <i>E. granulosus</i> | <i>C. quinquecirrha</i> | <i>A. aurita</i>     | 0.174391 | 0.222536 | 0.048146 | 7.835847  | 99.96% |
| <i>E. granulosus</i> | <i>C. quinquecirrha</i> | <i>A. digitifera</i> | 0.444085 | 0.501671 | 0.057586 | 6.839982  | 99.96% |
| <i>E. granulosus</i> | <i>C. quinquecirrha</i> | <i>H. vulgaris</i>   | 0.455097 | 0.392384 | 0.062713 | 7.824449  | 99.96% |
| <i>E. granulosus</i> | <i>C. quinquecirrha</i> | <i>N. vectensis</i>  | 0.329763 | 0.445399 | 0.115637 | 16.677930 | 99.96% |
| <i>E. granulosus</i> | <i>C. quinquecirrha</i> | <i>N. nomurai</i>    | 0.193754 | 0.246914 | 0.053160 | 8.820108  | 99.96% |

**Table S20. The relative evolution rate of species employed by MEGA.**

| Outgroup             | Ingroup1                | Ingroup2             | Identical | Ingroup1 specific | Ingroup2 specific | Chi-score | P-value  |
|----------------------|-------------------------|----------------------|-----------|-------------------|-------------------|-----------|----------|
| <i>E. granulosus</i> | <i>C. quinquecirrha</i> | <i>R. muelleri</i>   | 47,702    | 13,878            | 13,663            | 1.68      | 0.19514  |
| <i>E. granulosus</i> | <i>C. quinquecirrha</i> | <i>A. aurita</i>     | 50,205    | 6,909             | 6,017             | 61.56     | 0.000001 |
| <i>E. granulosus</i> | <i>C. quinquecirrha</i> | <i>A. digitifera</i> | 45,932    | 13,650            | 12,542            | 46.87     | 0.000001 |
| <i>E. granulosus</i> | <i>C. quinquecirrha</i> | <i>H. vulgaris</i>   | 47,587    | 11,266            | 12,473            | 61.37     | 0.000001 |
| <i>E. granulosus</i> | <i>C. quinquecirrha</i> | <i>N. vectensis</i>  | 50,644    | 13,293            | 10,697            | 280.92    | 0.000001 |
| <i>E. granulosus</i> | <i>C. quinquecirrha</i> | <i>N. nomurai</i>    | 57,391    | 8,585             | 7,466             | 78.01     | 0.000001 |
| <i>E. granulosus</i> | <i>C. quinquecirrha</i> | <i>S. pistillata</i> | 52,011    | 15,452            | 12,259            | 367.91    | 0.000001 |
| <i>E. granulosus</i> | <i>C. quinquecirrha</i> | <i>E. pallida</i>    | 50,596    | 14,797            | 12,119            | 266.45    | 0.000001 |
